# Supplementary material
Source: PubMed Central journal article supplement (PMC4638218)
Supplement: NIHMS734935-supplement-Supplement.pdf [file NIHMS734935-supplement-Supplement.pdf]

## **Supplementary Material**

**McGee et al. Biological properties of ligand-dependent activation of the MET receptor kinase in acute myeloid leukemia.**

# Supplementary Figure 1

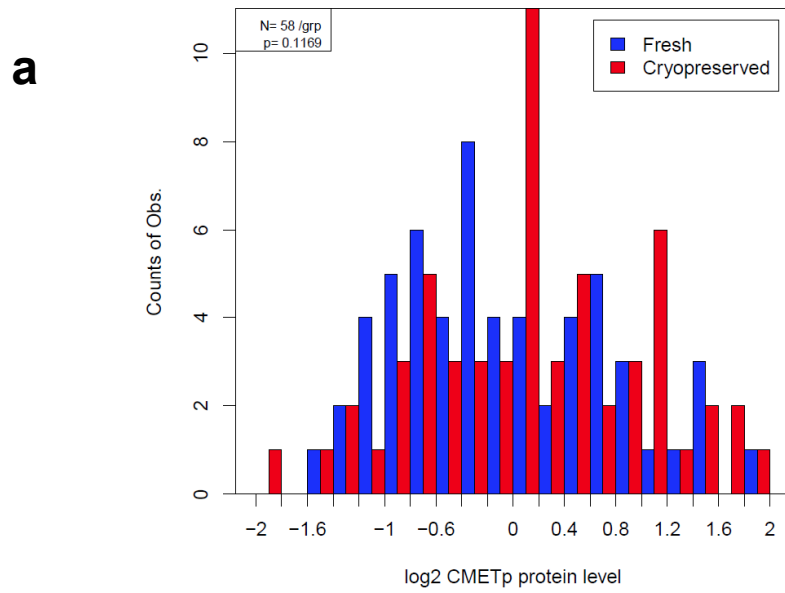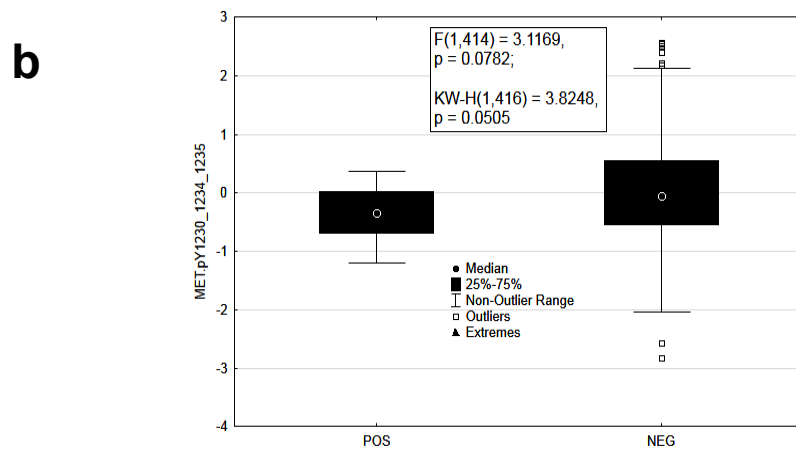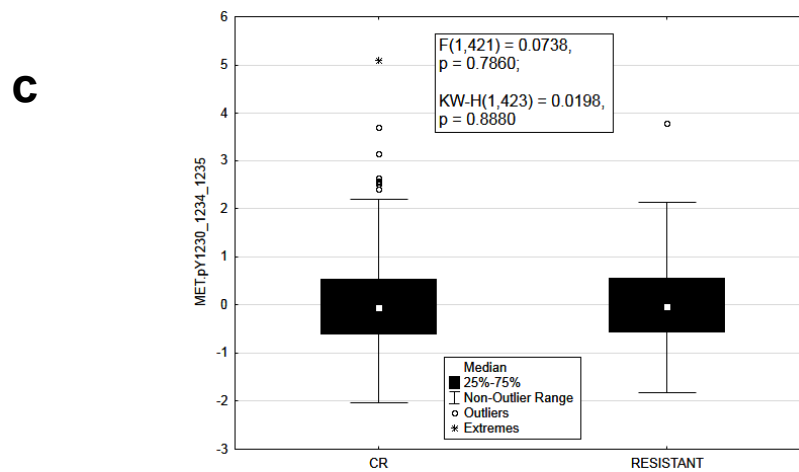

**Supplementary Figure 1.** (a) Distribution of protein levels for pairs of fresh and cryo-preserved samples showing no statistically significant difference in MET phosphorylation between the two sample types. (b) Analysis of MET phosphorylation as a function of FLT3 mutational status demonstrating an association of increased levels of MET phosphorylation in AML cells lacking FLT3 mutations. (c) Analysis of MET phosphorylation as a function of treatment response, demonstrating no apparent association with primary chemoresistance.

# Supplementary Figure 2

**a**

|                  | N   | Events | Median | 95% LCL | 95% UCL | Logrank.p | Cox.p |
|------------------|-----|--------|--------|---------|---------|-----------|-------|
| Overall Survival | 256 | 193    | 47.6   | 37.9    | 58.4    | 0.545     | 0.338 |
| Event Free       | 205 | 170    | 23.6   | 18.9    | 32.0    | 0.353     | 0.131 |
| CR Duration      | 123 | 74     | 54.7   | 42.4    | 97.9    | 0.026     | 0.272 |

**b**

| Dependent Variable: New OS (AML & NI B&M combo- 231AB-April 2014-METp analysis.sta)<br>Censoring var.: vital.status NEW<br>Chi² = 202.609 df = 6 p = 0.0000<br>Include condition: v3='aml' and v9='N'<br>Exclude condition: v46='na' |           |                |                |                |          |               |          |            |                      |                      |
|--------------------------------------------------------------------------------------------------------------------------------------------------------------------------------------------------------------------------------------|-----------|----------------|----------------|----------------|----------|---------------|----------|------------|----------------------|----------------------|
| N=415                                                                                                                                                                                                                                | Beta      | Standard Error | Beta 95% lower | Beta 95% upper | t-value  | Wald Statist. | p        | Risk ratio | Risk ratio 95% lower | Risk ratio 95% upper |
| Age.at.Dx                                                                                                                                                                                                                            | 0.043400  | 0.004820       | 0.03395        | 0.05284        | 9.00469  | 81.08443      | 0.000000 | 1.044356   | 1.034536             | 1.054268             |
| Performance.Status                                                                                                                                                                                                                   | 0.341491  | 0.065161       | 0.21378        | 0.469205       | 5.24070  | 27.46488      | 0.000000 | 1.407044   | 1.238346             | 1.598722             |
| WBC                                                                                                                                                                                                                                  | 0.006444  | 0.001202       | 0.00409        | 0.008800       | 5.35944  | 28.72360      | 0.000000 | 1.006464   | 1.004096             | 1.008839             |
| Male                                                                                                                                                                                                                                 | -0.317299 | 0.114582       | -0.54188       | -0.092723      | -2.76920 | 7.66845       | 0.005623 | 0.728113   | 0.581656             | 0.911446             |
| FavCyto                                                                                                                                                                                                                              | -0.902302 | 0.333517       | -1.55596       | -0.248621      | -2.70542 | 7.31927       | 0.006826 | 0.405635   | 0.210982             | 0.779876             |
| Unfavcyto                                                                                                                                                                                                                            | 0.505975  | 0.112768       | 0.28495        | 0.726996       | 4.48688  | 20.13211      | 0.000007 | 1.658602   | 1.329702             | 2.068856             |

**c**

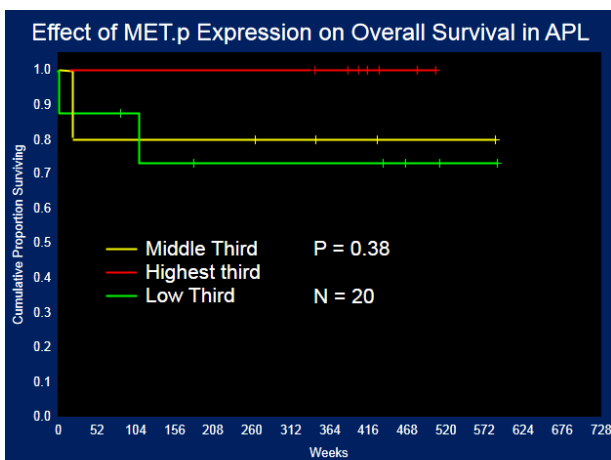

**d**

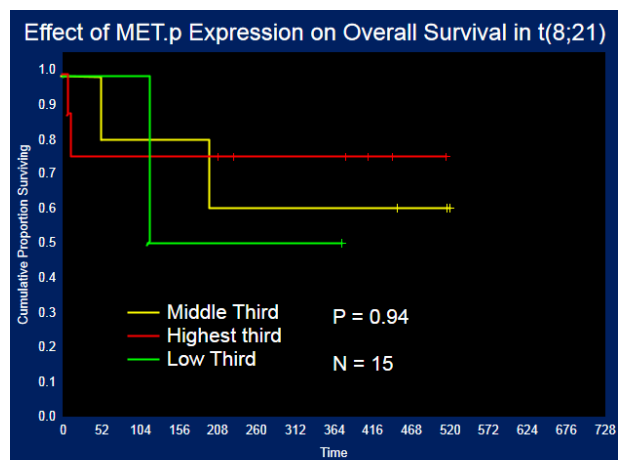

**Supplementary Figure 2. (a)** Summary of statistics from outcome analyses with survival reported in weeks. **(b)** Multivariate analysis of MET phosphorylation and overall survival. Kaplan-Meier analysis of overall survival in **(c)** APL (t(15;17)) and **(d)** AML1-ETO (t(18;21)) subgroups showing no association with MET activation.

# Supplemental Figure 3

**a**

| Negatively Correlated | Positively Correlated |
|-----------------------|-----------------------|
| PTPN11                | BAD.pS112             |
| GSKA_B                | RPS6KB1               |
| MAPK1                 | CASP9.CI330           |
| GAPDH                 | PPARA                 |
| EIF4E                 | HDAC3                 |
| PARK7                 | BMI1                  |
| EIF2AK2               | ZNF346                |
| NCL                   | EGFR                  |
| PTEN                  | JUNB                  |
| EIF2S1                | CASP9.cI315           |
| HNRNPK                | IRS1.pS1101           |
| TSC2                  | BAK1                  |
| CASP3                 | PLAC1                 |
| PSMD9.pS10            | CTSG                  |
| BRAF                  | YAP1p                 |
| MAP2K1                | YWHAZ                 |
| MAPK9                 | NRP1                  |
| PA2G4                 | CDKN1A                |
| INPP5D                | IGFBP2                |
| INPPL1                | STAT1-pY701           |
| MAPK14                | NF2.pS518             |
| STMN1                 | CTNNA1                |
| XIAP                  | AKT1_2_3.pT308        |
| SMAD2                 | CCND1                 |
| SIRT1                 | ODC1                  |
| SMAD3                 | ERBB3                 |
| KDR                   | GATA3                 |
| STK11                 | CTNNB1.pS33_37_41     |
| SMAD4                 | MSI2                  |
| SMAD1                 | BIRC2                 |
| BID                   | BIRC2                 |
| RELA                  | ATF3                  |
|                       | NOTCH3                |
|                       | BIRC5                 |
|                       | RAC1_2_3              |

**b**

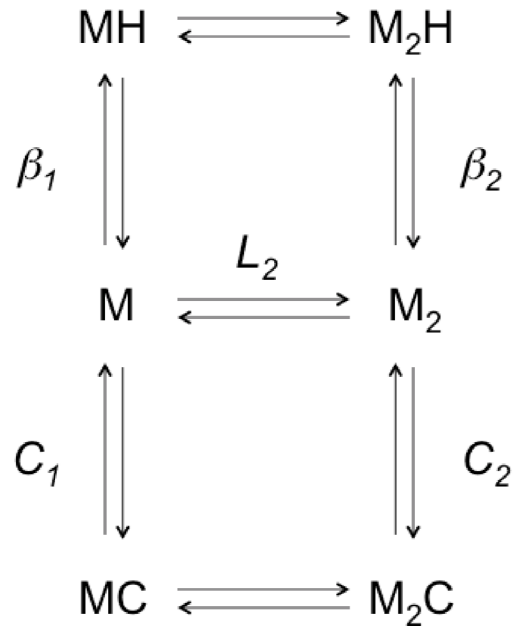

**c**

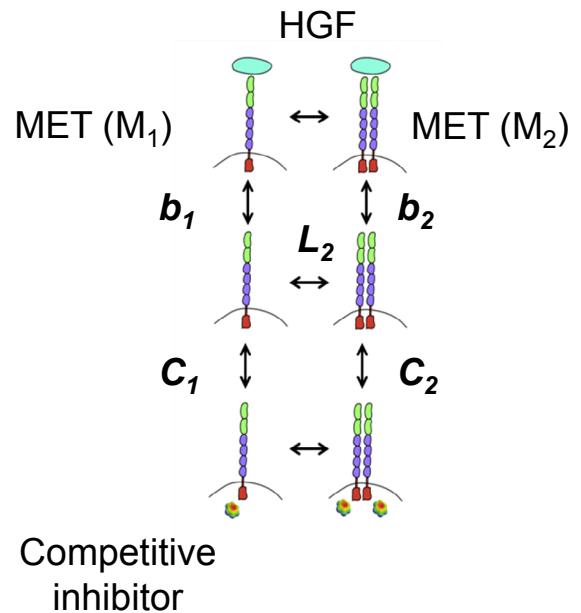

**Supplementary Figure 3. (a)** Proteins found by RPPA analysis to be positively and negatively associated with MET activation with Pearson correlation coefficients of  $> 0.2$  and  $< -0.2$ , respectively. **(b)** Thermodynamic model of the interaction between ligand-dependent MET receptor activation and competitive MET kinase inhibition where (M) represents the MET receptor, (H) represents the HGF ligand, and (C) represents a competitive kinase inhibitor. **(c)** Illustration of the thermodynamic model of ligand-dependent MET receptor activation.
